# Supplementary material for: Highly efficient Fischer–Tropsch synthesis over an alumina-supported ruthenium catalyst
Source: Royal Society of Chemistry journal article supplement (doi:10.1039/c7cy02361h), 2018-01-01
Supplement: c7cy02361h1.pdf [file c7cy02361h1.pdf]

### Supporting information

#### **Highly efficient Fischer-Tropsch synthesis over an alumina-supported ruthenium catalyst**

Chao Lian, ‡ Yulv Yu, ‡ Kai Zhang, Ang Gao, Yuan Wang\*

*Beijing National Laboratory for Molecular Sciences, State Key Laboratory for Structural Chemistry of Unstable and Stable Species, College of Chemistry and Molecular Engineering, Peking University, Beijing 100871, China.*

\* To whom correspondence should be addressed: Prof. Yuan Wang

Tel. No.: +86-10-6275-7497

Fax: +86-10-6276-5769

E-mail address: [wangy@pku.edu.cn](mailto:wangy@pku.edu.cn)

† Present address: Department of Chemistry, School of Science, Beijing Jiaotong University, Beijing, 100044, P. R. China

**Table S1.** Metal dispersions and particle sizes of the prepared Ru/ $\gamma$ -Al<sub>2</sub>O<sub>3</sub> catalysts.

| Catalyst                                          | Dispersion (%) <sup>a</sup> | Particle size (nm)                        |     |
|---------------------------------------------------|-----------------------------|-------------------------------------------|-----|
|                                                   |                             | H <sub>2</sub> Chemisorption <sup>b</sup> | TEM |
| Ru/ $\gamma$ -Al <sub>2</sub> O <sub>3</sub> -PHR | 62                          | 2.1                                       | 2.5 |
| Ru/ $\gamma$ -Al <sub>2</sub> O <sub>3</sub> -H   | 83                          | 1.6                                       | 2.1 |
| Ru/ $\gamma$ -Al <sub>2</sub> O <sub>3</sub> -D   | 73                          | 1.8                                       | 2.4 |

<sup>a</sup> measured by H<sub>2</sub> Chemisorption [1].

<sup>b</sup> Calculated by the following equation: particle size (nm) = 1.32/dispersion [2].

For the three catalysts, the average diameters of Ru nanoparticles calculated from the H<sub>2</sub> chemisorption results were slightly smaller than those measured by TEM.

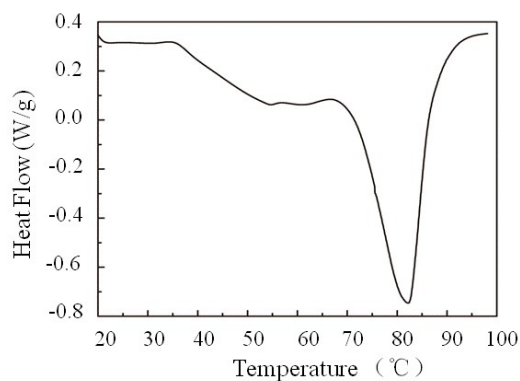

**Fig. S1.** DSC curve of the FT wax.

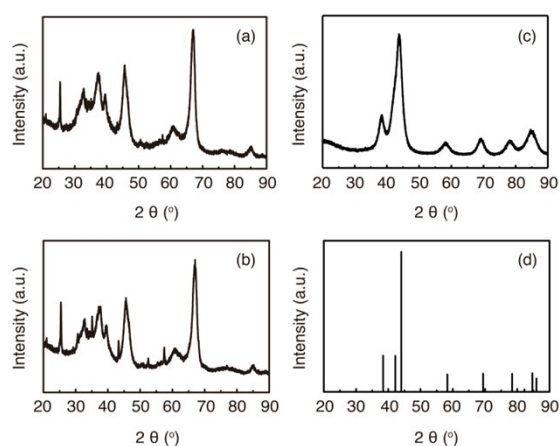

**Fig. S2.** XRD patterns of Ru/γ-Al<sub>2</sub>O<sub>3</sub>-PHR (a), the γ-Al<sub>2</sub>O<sub>3</sub> support (b), Ru powder prepared by the same method in the absence of a support (c), and standard diffraction signals of hcp Ru (JCPDS #65-1863) (d).

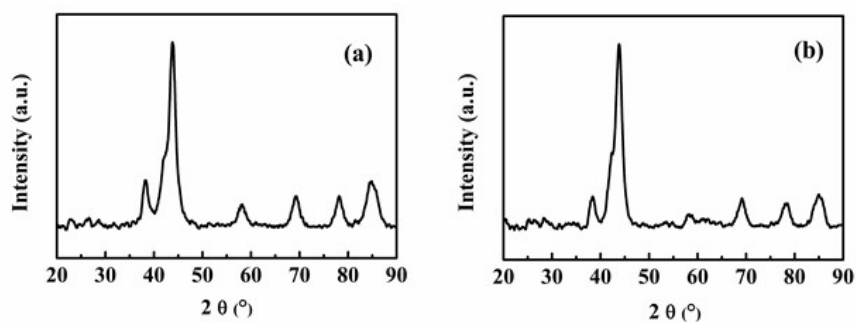

**Fig. S3.** XRD patterns of Ru powders prepared by reducing RuO<sub>2</sub>·xH<sub>2</sub>O with H<sub>2</sub> in cyclohexane (a) and in anhydrous atmosphere (b).

## References

- [1] K. C. Taylor, *J. Catal.*, 1975, **38**, 299.
- [2] J. Álvarez-Rodríguez, A. Guerrero-Ruiz, I. Rodríguez-Ramos, A. Arcoya-Martín, *Catal. Today.*, 2005, **107**, 302-309.
